# Supplementary material for: Whole-genome sequencing and analysis of the Chinese herbal plant Gelsemium elegans
Source: PubMed Central journal article supplement — Acta Pharm Sin B. 2019 Aug 16;10(2):374–82. doi: 10.1016/j.apsb.2019.08.004 (PMC7016290; doi:10.1016/j.apsb.2019.08.004), 2019-08-16
Supplement: mmc3.pdf [file mmc3.pdf]

## Supporting Information for

### Short communication

## Whole-genome sequencing and analysis of the Chinese herbal plant *Gelsemium elegans*

Yisong Liu<sup>a,b,c,†</sup>, Qi Tang<sup>b,†</sup>, Pi Cheng<sup>b,†</sup>, Mingfei Zhu<sup>d</sup>, Hui Zhang<sup>d</sup>, Jiazhe Liu<sup>d</sup>, Mengting Zuo<sup>c</sup>, Chongyin Huang<sup>c</sup>, Changqiao Wu<sup>b</sup>, Zhiliang Sun<sup>a,b,c,\*</sup>, Zhaoying Liu<sup>a,b,c,\*</sup>

<sup>a</sup>*Hunan Engineering Technology Research Center of Veterinary Drugs, Hunan Agricultural University, Changsha 410128, China*

<sup>b</sup>*Hunan Key Laboratory of Traditional Chinese Veterinary Medicine, Hunan Agricultural University, Changsha 410128, China*

<sup>c</sup>*College of Veterinary Medicine, Hunan Agricultural University, Changsha 410128, China*

<sup>d</sup>*Nextomics Biosciences Institute, Wuhan 430000, China*

Received 15 April 2019; received in revised form 27 June 2019; accepted 26 July 2019

\*Corresponding authors. Tel./fax: +86 731 84635054.

E-mail addresses: sunzhiliang1965@aliyun.com (Zhiliang Sun), liu\_zhaoying@hunau.edu.cn (Zhaoying Liu).

†These authors made equal contributions to this work.

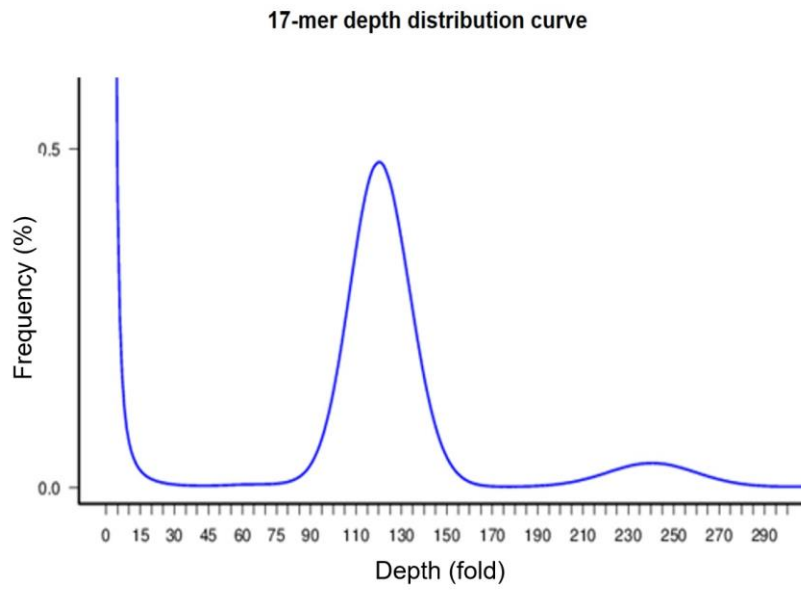

**Figure S1** Frequency distribution of the 17-mer graph analysis used to estimate the size of the *Gelsemium elegans* genome

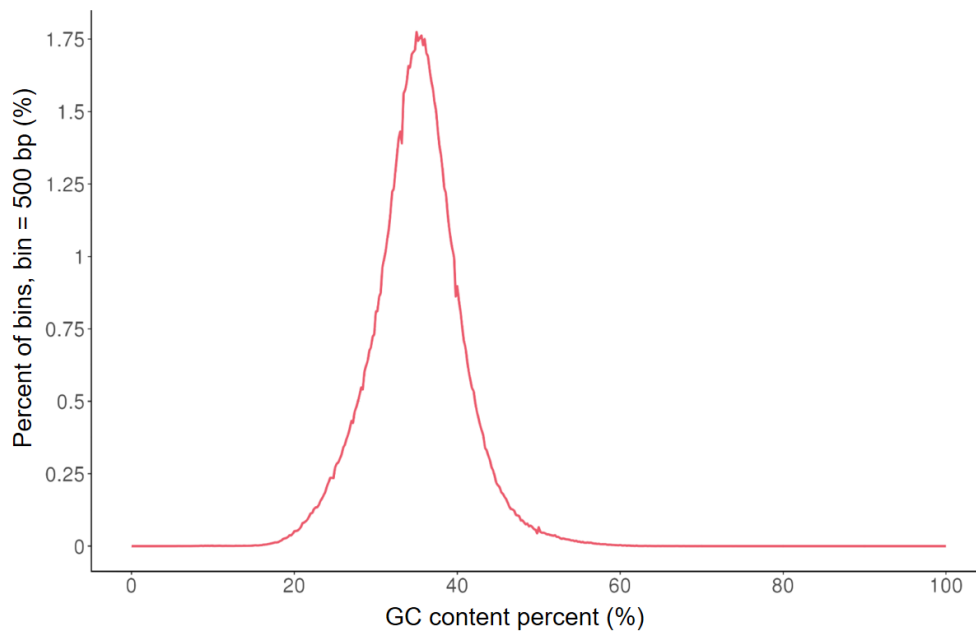

**Figure S2** GC content distribution of the *Gelsemium elegans* genome. The GC content was established using 500 bp sliding windows.

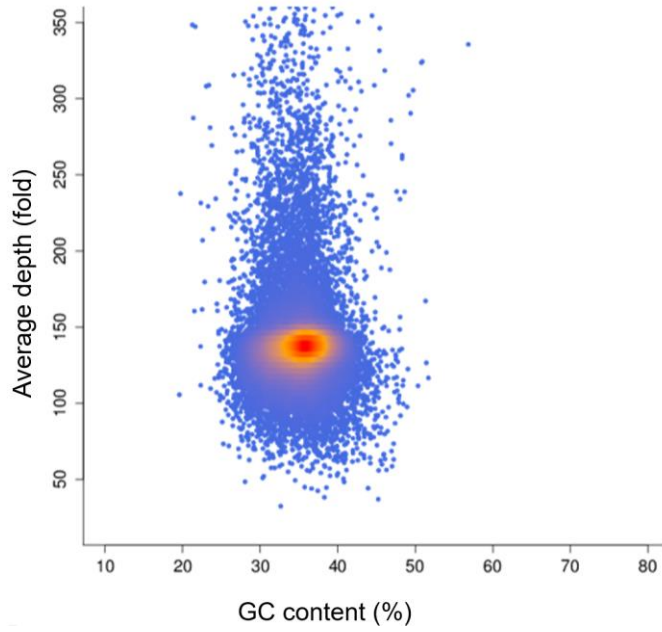

**Figure S3** The GC depth distribution of the *Gelsemium elegans* genome.

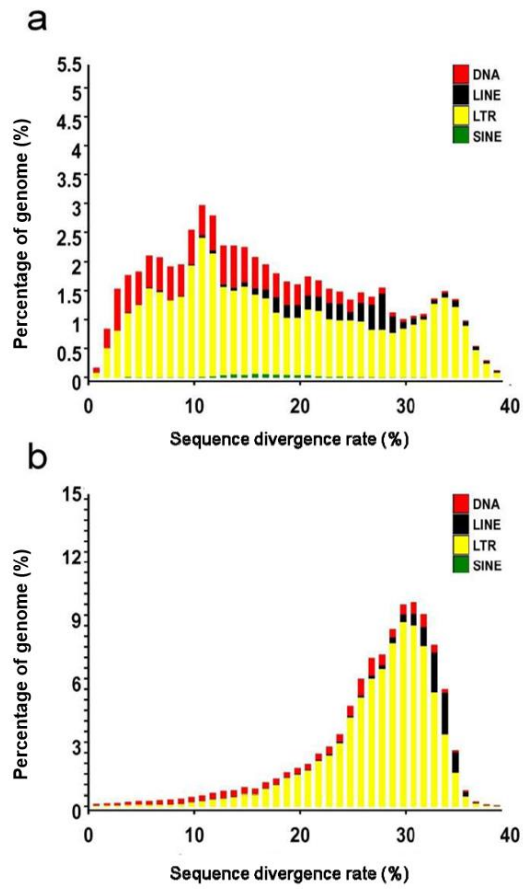

**Figure S4** RepeatMasker analysis of the *Gelsemium elegans* genome assembly. (a) *De novo*; (b) Rebase.

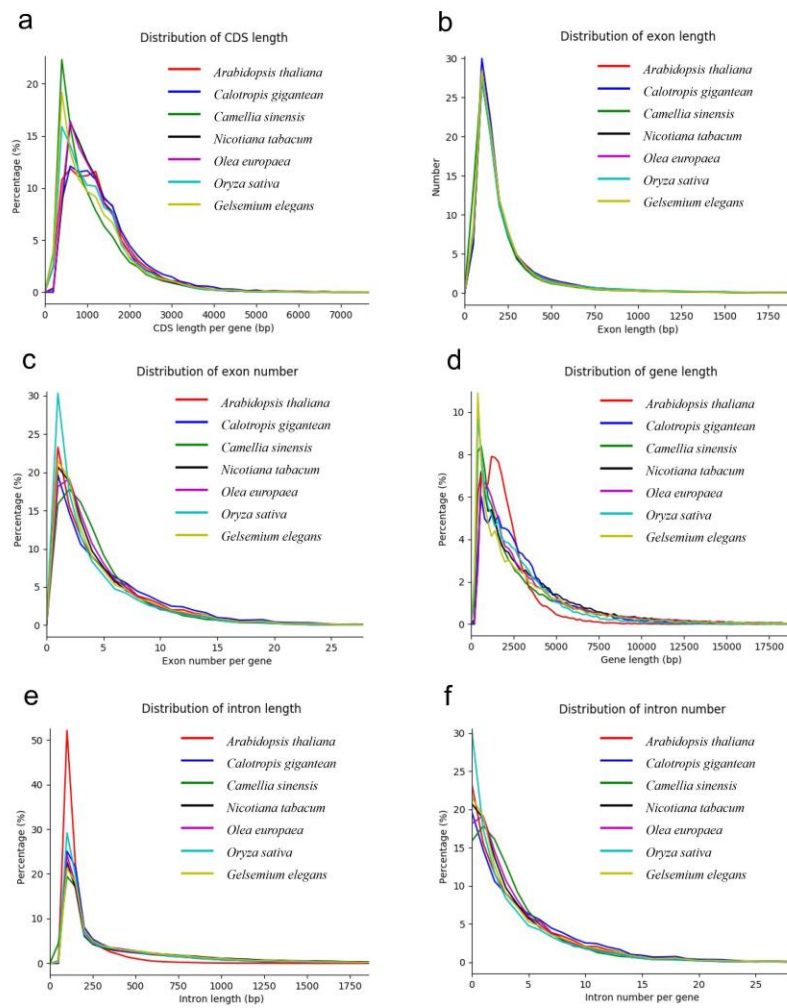

**Figure S5** Comparison of gene structure characteristics in *Gelsemium elegans* to that in other plants. (a) CDS length; (b) exon length; (c) exon number; (d) gene length; (e) intron length; (f) intron number.

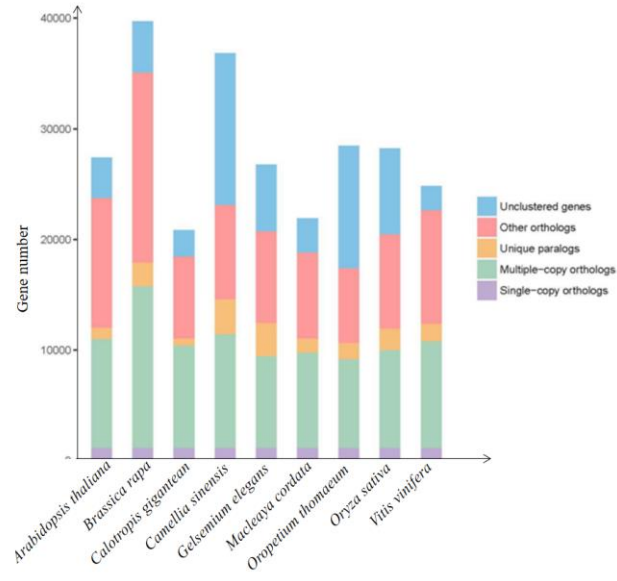

**Figure S6** Gene orthology determined by comparing genomes using the OrthoMCL software.

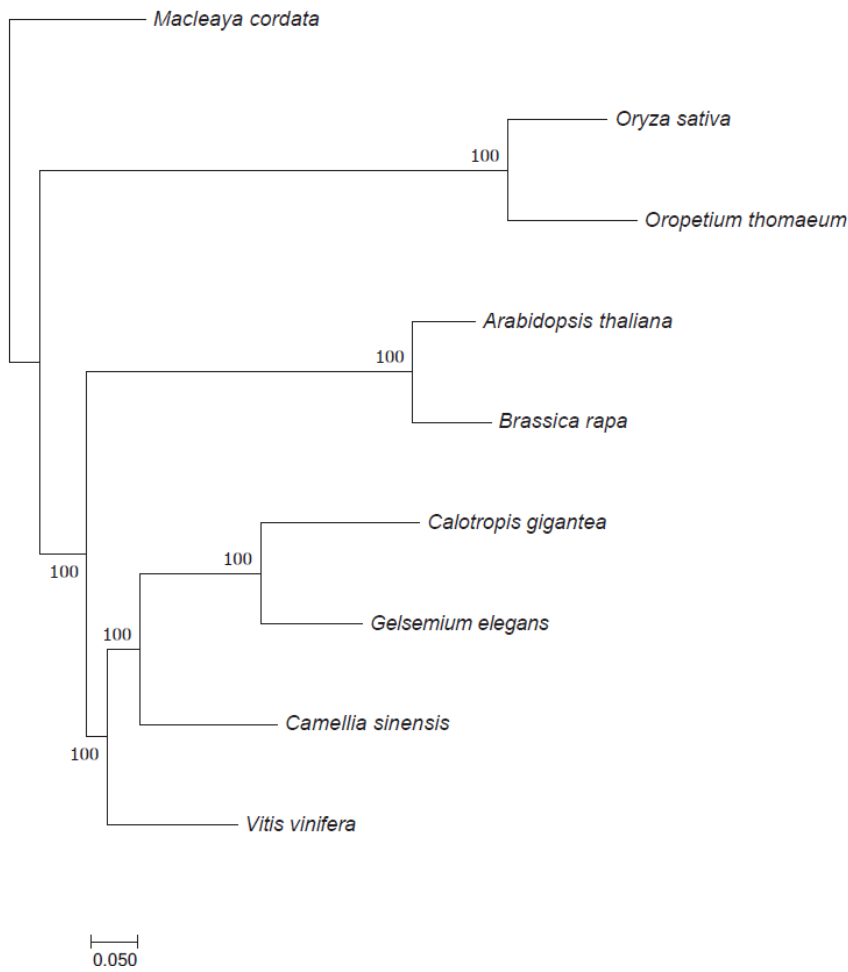

**Figure S7** The maximum-likelihood phylogeny of *Gelsemium elegans* and 8 other plants. The bootstrap value is shown at each node.

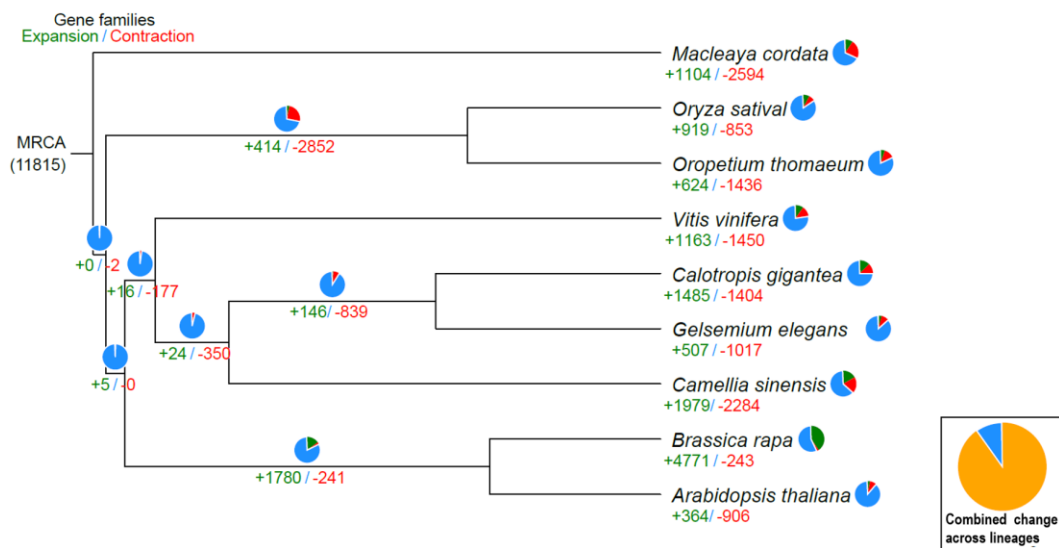

**Figure S8** Gene family expansions and contractions in *Gelsemium elegans* and 8 other plants.

**Table S1** Sequencing statistics from the nanopore sequencing.

| Total pass reads bases (Gb) | Total pass reads number | Pass reads mean length (kb) | Pass reads max length (kb) | Pass reads N50 length (kb) | Pass reads > 10kb ratio | Pass reads > 40kb ratio |
|-----------------------------|-------------------------|-----------------------------|----------------------------|----------------------------|-------------------------|-------------------------|
| 56.11                       | 3,663,275               | 14.59                       | 153.61                     | 36.22                      | 51.49%                  | 2.96%                   |

**Table S2** Summary of the transcriptome and their mapping rate on the genome assembly.

| Sample   | Tissue | Total reads number | Mapped reads number | Mapping rate (%) |
|----------|--------|--------------------|---------------------|------------------|
| R1704065 | Leaf   | 23,785,097         | 21,901,917          | 92.08            |
| R1704066 | Leaf   | 22,455,658         | 20,668,723          | 92.04            |
| R1704067 | Leaf   | 25,131,247         | 23,132,168          | 92.04            |
| R1704068 | Root   | 20,748,256         | 19,109,832          | 92.10            |
| R1704069 | Root   | 31,713,585         | 29,130,646          | 91.85            |
| R1704070 | Root   | 28,468,029         | 26,068,705          | 91.57            |

**Table S3** Summary of clean reads generated from transcriptome sequencing by Illumina HiseqX Ten.

| Sample     | Clean reads | Clean bases    | Q30 rate (%) |
|------------|-------------|----------------|--------------|
| GEflower_a | 67,922,518  | 10,168,126,580 | 0.94         |
| GEflower_b | 70,570,098  | 10,546,666,299 | 0.96         |
| GEflower_c | 89,613,594  | 13,392,480,334 | 0.96         |
| GEleaf_a   | 81,439,082  | 12,189,647,061 | 0.97         |
| GEleaf_b   | 75,611,228  | 11,314,844,846 | 0.97         |
| GEleaf_c   | 85,305,224  | 12,764,365,164 | 0.97         |
| GEroot_a   | 69,298,662  | 10,368,060,758 | 0.97         |
| GEroot_b   | 82,342,200  | 12,322,538,800 | 0.95         |
| GEroot_c   | 71,294,892  | 10,674,266,631 | 0.95         |
| GEstem_a   | 73,210,680  | 10,948,432,092 | 0.96         |
| GEstem_b   | 72,638,140  | 10,858,155,675 | 0.96         |
| GEstem_c   | 69,291,652  | 10,359,264,597 | 0.96         |

**Table S4** Estimation of genome size based on 17-mer statistics.

| <i>k</i> -mer value | <i>k</i> -mer number | <i>k</i> -mer depth | Genome size (bp) | Heterozygosity rate (%) |
|---------------------|----------------------|---------------------|------------------|-------------------------|
| 17                  | 40,563,763,104       | 120                 | 338,031,359      | 0.38                    |

**Table S5** Statistics of initial assembly results.

| Statistic type    | Contig length (bp) | Contig number |
|-------------------|--------------------|---------------|
| N50               | 10,143,347         | 12            |
| N60               | 7,085,978          | 15            |
| N70               | 5,466,148          | 21            |
| N80               | 1,321,283          | 34            |
| N90               | 236,259            | 100           |
| Longest           | 18,101,142         | 1             |
| Total             | 331,825,569        | 738           |
| Length $\geq$ 1kb | 331,825,569        | 738           |
| Length $\geq$ 2kb | 331,825,569        | 738           |
| Length $\geq$ 5kb | 331,825,569        | 738           |

**Table S6** Summary of the genome final assembly after polish.

| Statistic type    | Contig length (bp) | Contig number |
|-------------------|--------------------|---------------|
| N50               | 10,238,528         | 12            |
| N60               | 7,156,190          | 15            |
| N70               | 5,523,542          | 21            |
| N80               | 1,337,470          | 34            |
| N90               | 239,091            | 100           |
| Longest           | 18,270,620         | 1             |
| Total             | 335,134,780        | 738           |
| Length $\geq$ 1kb | 335,134,780        | 738           |
| Length $\geq$ 2kb | 335,134,780        | 738           |
| Length $\geq$ 5kb | 335,134,780        | 738           |



**Table S8** The contig cluster of 8 pseudo-chromosomes length.

| Pseudo-chromosome | Size        | Scaffold number |
|-------------------|-------------|-----------------|
| Chr01             | 52,329,522  | 63              |
| Chr02             | 45,875,187  | 124             |
| Chr03             | 44,416,115  | 69              |
| Chr04             | 40,473,783  | 6               |
| Chr05             | 38,673,583  | 55              |
| Chr06             | 38,231,740  | 72              |
| Chr07             | 36,223,536  | 91              |
| Chr08             | 36,075,847  | 65              |
| Total             | 332,299,313 | 545             |

**Table S9** Summary of BUSCO analysis results according to assembly.

| Type                                | Number | Compare to the total<br>BUSCO groups (%) |
|-------------------------------------|--------|------------------------------------------|
| Complete BUSCOs (C)                 | 1338   | 92.9                                     |
| Complete and single-copy BUSCOs (S) | 1308   | 90.8                                     |
| Complete and duplicated BUSCOs (D)  | 30     | 2.1                                      |
| Fragmented BUSCOs (F)               | 29     | 2.0                                      |
| Missing BUSCOs (M)                  | 73     | 5.1                                      |
| Total BUSCO groups searched         | 1440   | 100                                      |

**Table S10** Summary of the SSR search results.

| Repeat type      | Unit size (repeat number) | Number  |
|------------------|---------------------------|---------|
| Mono-nucleotide  | 1 ( $\geq 10$ )           | 134,047 |
| Di-nucleotide    | 2 ( $\geq 6$ )            | 29,668  |
| Tri-nucleotide   | 3 ( $\geq 5$ )            | 9,336   |
| Tetra-nucleotide | 4 ( $\geq 5$ )            | 1,557   |
| Penta-nucleotide | 5 ( $\geq 5$ )            | 409     |
| Hexa-nucleotide  | 7 ( $\geq 5$ )            | 444     |

**Table S11** The repeat of the *G. elegans* genome assembly.

| Type                                                      | Repeat size (bp) | Percentage of genome (%) |
|-----------------------------------------------------------|------------------|--------------------------|
| <i>Trf</i>                                                | 32,316,704       | 9.64                     |
| RepeatProteinMask                                         | 46,644,858       | 13.92                    |
| RepeatMasker (Rebase)                                     | 43,991,917       | 13.13                    |
| RepeatMasker (Mips-REdat)                                 | 41,664,552       | 12.43                    |
| <i>Denovo</i> (RepeatModeler) <i>novo</i> (RepeatModeler) | 89,166,197       | 26.61                    |
| Total                                                     | 144,642,909      | 43.16                    |

**Table S12** Repeat annotation of the *Gelsemium elegans* genome assembly.

| Type*   | Rebase TEs  |             | Mips-REdat TEs |             | TE proteins |             | RepeatModeler |             | Combined TEs |             |
|---------|-------------|-------------|----------------|-------------|-------------|-------------|---------------|-------------|--------------|-------------|
|         | Length (Mb) | % in genome | Length (Mb)    | % in genome | Length (Mb) | % in genome | Length (Mb)   | % in genome | Length (Mb)  | % in genome |
| DNA     | 3,771,418   | 1.13        | 1,074,439      | 0.32        | 3,848,392   | 1.15        | 10,689,208    | 3.19        | 12,050,722   | 3.6         |
| LINE    | 3,594,794   | 1.07        | 1,519,190      | 0.45        | 6,342,959   | 1.89        | 4,580,193     | 1.37        | 7,176,479    | 2.14        |
| LTR     | 36,260,317  | 10.82       | 38,907,712     | 11.61       | 36,289,011  | 10.83       | 40,751,378    | 12.16       | 80,110,096   | 23.9        |
| SINE    | 5,000       | 0           | 11,617         | 0           | 0           | 0           | 670,701       | 0.2         | 618,147      | 0.18        |
| Other   | 344,384     | 0.11        | 151,594        | 0.05        | 164,496     | 0.05        | 0             | 0           | 26,856,213   | 8.02        |
| Unknown | 16,004      | 0           | 0              | 0           | 0           | 0           | 33,125,998    | 9.88        | 17,831,252   | 5.32        |
| Total   | 43,991,917  | 13.13       | 41664552       | 12.43       | 46,644,858  | 13.92       | 89,166,197    | 26.61       | 144,642,909  | 43.16       |

\*DNA, DNA transposon; LINE, long interspersed nuclear element; TEs, transposable elements; SINE, short interspersed nuclear element; LTR, long terminal repeat.

**Table S13** Summary of non-protein-coding gene annotations in the *Gelsemium elegans* genome assembly.

| Type     | Copy number | Average length (bp) | Total length (bp) | Percentage (%) of genome |
|----------|-------------|---------------------|-------------------|--------------------------|
| rRNA     | 279         | 1079.33             | 301,132           | 0.065048                 |
| 18S      | 29          | 1899.62             | 55,089            | 0.011900                 |
| 28S      | 39          | 5680.03             | 221,521           | 0.047851                 |
| 5.8S     | 20          | 153.60              | 3,072             | 0.000664                 |
| 5S       | 191         | 112.30              | 21,450            | 0.004633                 |
| snRNA    | 1257        | 106.79              | 134237            | 0.028997                 |
| CD-box   | 1150        | 103.59              | 119,129           | 0.025733                 |
| HACA-box | 28          | 131.00              | 3,668             | 0.000792                 |
| Splicing | 79          | 144.81              | 11,440            | 0.002471                 |
| miRNA    | 208         | 122.62              | 25,505            | 0.005509                 |
| tRNA     | 531         | 74.88               | 39,761            | 0.008589                 |

**Table S14** Gene annotation statistics of the *Gelsemium elegans* genome assembly.

| Gene set       |                    | Total<br>number of<br>CDS | Average<br>transcript<br>length (bp) | Average<br>CDS length<br>(bp) | Average exon<br>number<br>pergene | Average<br>exon length (bp) | Average intron<br>length (bp) |
|----------------|--------------------|---------------------------|--------------------------------------|-------------------------------|-----------------------------------|-----------------------------|-------------------------------|
| <i>De novo</i> | Augustus           | 30,257                    | 2,323.9                              | 962.68                        | 4.61                              | 208.74                      | 376.88                        |
|                | Gene ID            | 26,980                    | 5,890.56                             | 967.15                        | 5.12                              | 188.95                      | 1,195.44                      |
|                | Snap               | 40,763                    | 6,687.38                             | 912.33                        | 7.1                               | 128.46                      | 946.39                        |
| Homology       | <i>A. thaliana</i> | 24,855                    | 2,840.18                             | 967.74                        | 3.79                              | 255.27                      | 670.9                         |
|                | <i>C. gigantea</i> | 21,287                    | 3,350.2                              | 932.06                        | 3.64                              | 256.01                      | 915.74                        |
|                | <i>C. sinensis</i> | 22,049                    | 3,573.91                             | 1,067.08                      | 4.4                               | 242.67                      | 737.9                         |
|                | <i>N. tabacum</i>  | 22,963                    | 2,368.12                             | 885.53                        | 3.32                              | 266.66                      | 638.84                        |
|                | <i>O. europaea</i> | 22,903                    | 3,004.06                             | 1,029.97                      | 4.06                              | 253.6                       | 644.88                        |
|                | <i>O. sativaL</i>  | 22,907                    | 2,309.66                             | 877.79                        | 3.17                              | 277.28                      | 661.18                        |
| Final set      | EVM                | 26,768                    | 3,961.71                             | 1,088.11                      | 4.98                              | 218.63                      | 722.54                        |

**Table S15** Comparative gene statistics.

| Specie             | Totalnumero<br>fgene | Average<br>transcript<br>length (bp) | Average<br>CDS<br>length (bp) | Average<br>exon<br>number<br>per gene | Average<br>exon<br>length (bp) | Average<br>intron<br>length (bp) |
|--------------------|----------------------|--------------------------------------|-------------------------------|---------------------------------------|--------------------------------|----------------------------------|
| <i>G.elegans</i>   | 26,768               | 3,961.71                             | 1,088.11                      | 4.98                                  | 218.63                         | 722.54                           |
| <i>A. thaliana</i> | 27,416               | 1,875.54                             | 1,220.7                       | 5.14                                  | 237.3                          | 158.02                           |
| <i>C. gigantea</i> | 20,831               | 3,126.12                             | 1,345.81                      | 5.84                                  | 230.49                         | 367.92                           |
| <i>C. sinensis</i> | 36,841               | 3,285.39                             | 988.26                        | 4.69                                  | 210.89                         | 623.17                           |
| <i>N.tabacum</i>   | 60,288               | 3,718.43                             | 1,163.23                      | 4.74                                  | 245.58                         | 683.82                           |
| <i>O.europaea</i>  | 39,579               | 3,656.34                             | 1,168.54                      | 4.78                                  | 244.33                         | 657.7                            |
| <i>O.sativaL</i>   | 28,225               | 2,454.91                             | 1,086.74                      | 4.27                                  | 254.55                         | 418.5                            |

**Table S16** Functional annotation of predicted genes of *Gelsemium elegans*.

|            | Database     | Number | Annotated percent (%) |
|------------|--------------|--------|-----------------------|
| Annotation | Swissprot    | 16,817 | 62.83                 |
|            | TrEMBL       | 22,545 | 84.22                 |
|            | KEGG         | 7,919  | 29.58                 |
|            | GO           | 12,832 | 47.94                 |
|            | COG          | 12,552 | 46.89                 |
|            | InterProScan | 18,280 | 68.29                 |
| Total      | Annotated    | 22,636 | 84.56                 |
|            | Gene         | 26,768 | –                     |

–Not applicable

**Table S17** Summary of BUSCO analysis results according to prediction.

| Type                                | Number | Annotated percent (%) |
|-------------------------------------|--------|-----------------------|
| Complete BUSCOs (C)                 | 1375   | 95.5                  |
| Complete and single-copy BUSCOs (S) | 1349   | 93.7                  |
| Complete and duplicated BUSCOs (D)  | 26     | 4.8                   |
| Fragmented BUSCOs (F)               | 16     | 1.1                   |
| Missing BUSCOs (M)                  | 49     | 3.4                   |
| Total BUSCO groups searched         | 1440   | –                     |

–Not applicable

**Table S18** Summary statistics of gene families in 9 plant species.

| Specie                      | Gene number | Gene family | Unclustered gene number | Unclustered gene family | Unique family number | Average gene |
|-----------------------------|-------------|-------------|-------------------------|-------------------------|----------------------|--------------|
| <i>Arabidopsis thaliana</i> | 27,416      | 23,776      | 3,640                   | 15,745                  | 347                  | 1.51         |
| <i>Brassica rapa</i>        | 39,717      | 35,083      | 4,634                   | 16,051                  | 602                  | 2.19         |
| <i>Calotropis gigantea</i>  | 20,831      | 18,474      | 2,357                   | 12,313                  | 216                  | 1.50         |
| <i>Camellia sinensis</i>    | 36,841      | 23,127      | 13,714                  | 12,543                  | 953                  | 1.84         |
| <i>Gelsemium elegans</i>    | 26,768      | 20,755      | 6,013                   | 13,792                  | 903                  | 1.50         |
| <i>Macleaya cordata</i>     | 21,907      | 18,845      | 3,062                   | 12,066                  | 311                  | 1.56         |
| <i>Oropetium thomaeum</i>   | 28,446      | 17,425      | 11,021                  | 12,783                  | 621                  | 1.36         |
| <i>Oryza sativa</i> L       | 28,225      | 20,499      | 7,726                   | 13,120                  | 633                  | 1.56         |
| <i>Vitis vinifera</i>       | 24,821      | 22,644      | 2,177                   | 13,156                  | 390                  | 1.72         |

**Table S19** Candidate positively selected genes in the *Gelsemium elegans* lineage

| Group         | <i>P</i> value        | Positive site number | Gene                   | Swissprot function                                              |
|---------------|-----------------------|----------------------|------------------------|-----------------------------------------------------------------|
| ortholog05642 | 0.000629              | 1                    | evm.model.Contig5.1222 | Phosphatidylinositol/phosphatidylcholine transfer protein SFH12 |
| ortholog00678 | 0.037136              | 1                    | evm.model.Contig9.685  | Cullin-associated NEDD8-dissociated protein 1                   |
| ortholog09581 | 0.036572              | 3                    | evm.model.Contig22.161 | Checkpoint protein hus1 homolog                                 |
| ortholog07073 | $1.86 \times 10^{-7}$ | 11                   | evm.model.Contig9.218  | Zinc finger CCCH domain-containing protein 1                    |
| ortholog15048 | 0.044781              | 4                    | evm.model.Contig1.330  | Uncharacterized protein C1683.06c                               |
| ortholog06103 | 0.018971              | 1                    | evm.model.Contig2.1905 | WD repeat-containing protein 3                                  |
| ortholog19149 | 0.000184              | 2                    | evm.model.Contig9.557  | Probable Xaa-Pro aminopeptidase 3                               |
| ortholog05212 | 0.01273               | 1                    | evm.model.Contig11.399 | Protein CLP1 homolog                                            |
| ortholog05899 | 0.018062              | 2                    | evm.model.Contig22.659 | E3 ubiquitin-protein ligase MARCH1                              |
| ortholog20263 | 0.037057              | 1                    | evm.model.Contig3.1279 | Condensin-2 complex subunit G2                                  |
| ortholog02837 | 0.029401              | 1                    | evm.model.Contig20.646 | RNA exonuclease 4                                               |
| ortholog06318 | 0.005725              | 1                    | evm.model.Contig3.468  | Uncharacterized tRNA/rRNA methyltransferaseYsgA                 |
| ortholog13296 | 0.024789              | 2                    | evm.model.Contig15.297 | PsbP domain-containing protein 6, chloroplastic                 |
| ortholog15845 | 0.009238              | 1                    | evm.model.Contig19.432 | Protein CHROMATIN REMODELING 25                                 |
| ortholog00407 | 0.023281              | 1                    | evm.model.Contig22.289 | Methyltransferase-like protein 22                               |
| ortholog03122 | 0.028539              | 46                   | evm.model.Contig3.2082 | Pentatricopeptide repeat-containing protein At5g14080           |
| ortholog10186 | 0.03142               | 1                    | evm.model.Contig7.1120 | Protein MIZU-KUSSEI 1                                           |
| ortholog08097 | 0.001847              | 2                    | evm.model.Contig2.1862 | Pentatricopeptide repeat-containing protein At5g03800           |
| ortholog01318 | 0.027228              | 2                    | evm.model.Contig6.871  | Uncharacterized protein At2g39910                               |
| ortholog06837 | $9.44 \times 10^{-5}$ | 4                    | evm.model.Contig3.2020 | COP9 signalosome complex subunit 3                              |
| ortholog12455 | 0.000311              | 2                    | evm.model.Contig6.1339 | Phosphomannomutase/phosphoglucomutase                           |



---

|               |                       |    |                        |                                                                                  |
|---------------|-----------------------|----|------------------------|----------------------------------------------------------------------------------|
| ortholog17353 | 0.009301              | 2  | evm.model.Contig4.615  | Replication factor C subunit 1                                                   |
| ortholog11825 | 0.034555              | 1  | evm.model.Contig19.2   | AT-rich interactive domain-containing protein 3                                  |
| ortholog00415 | 0.043436              | 1  | evm.model.Contig5.74   | DEAD-box ATP-dependent RNA helicase 24                                           |
| ortholog10208 | 0.047319              | 1  | evm.model.Contig4.421  | DNA polymerase epsilon catalytic subunit A                                       |
| ortholog03255 | $1.31 \times 10^{-6}$ | 14 | evm.model.Contig20.188 | Protein CWC15 homolog A                                                          |
| ortholog06371 | 0.046945              | 2  | evm.model.Contig8.491  | Protein THYLAKOID FORMATION1, chloroplastic                                      |
| ortholog20051 | $9.04 \times 10^{-7}$ | 7  | evm.model.Contig1.81   | Probable prefoldin subunit 3                                                     |
| ortholog16201 | 0.006934              | 2  | evm.model.Contig6.1545 | Gamma-soluble NSF attachment protein                                             |
| ortholog05551 | 0.033047              | 1  | evm.model.Contig7.1244 | Pentatricopeptide repeat-containing protein At1g19525                            |
| ortholog09635 | 0.045576              | 1  | evm.model.Contig1.1299 | Probable acyl-activating enzyme 18, peroxisomal                                  |
| ortholog09255 | 0.000123              | 2  | evm.model.Contig6.1532 | Peptide chain release factor PrfB1, chloroplastic                                |
| ortholog00196 | 0.034474              | 1  | evm.model.Contig3.1139 | ATP-dependent Clp protease proteolytic subunit 3, chloroplastic                  |
| ortholog03004 | 0.034315              | 1  | evm.model.Contig14.548 | Putative DEAD-box ATP-dependent RNA helicase 29                                  |
| ortholog02844 | 0.024832              | 1  | evm.model.Contig4.556  | Ribonuclease inhibitor                                                           |
| ortholog00001 | 0.00854               | 1  | evm.model.Contig28.10  | Vacuolar protein-sorting-associated protein 11 homolog                           |
| ortholog17130 | 0.015842              | 5  | evm.model.Contig4.438  | Beta-1,6-galactosyltransferase GALT29A                                           |
| ortholog13337 | 0.014621              | 1  | evm.model.Contig3.2051 | Protease HtpX homolog 2                                                          |
| ortholog13201 | $2.07 \times 10^{-8}$ | 16 | evm.model.Contig3.2119 | Histone-lysine <i>N</i> -methyltransferase, H3 lysine-9 specific SUVH4           |
| ortholog01743 | 0.002436              | 3  | evm.model.Contig2.764  | APO protein 2, chloroplastic                                                     |
| ortholog08204 | $8.93 \times 10^{-8}$ | 14 | evm.model.Contig1.481  | Protein CDC73 homolog                                                            |
| ortholog04915 | 0.000112              | 6  | evm.model.Contig10.606 | Probable dolichyl pyrophosphate Glc1Man9GlcNAc2<br>alpha-1,3-glucosyltransferase |
| ortholog15219 | $4.04 \times 10^{-5}$ | 3  | evm.model.Contig8.668  | Membrane metalloprotease ARASP, chloroplastic                                    |
| ortholog01622 | 0.000561              | 7  | evm.model.Contig20.686 | Protein DJ-1 homolog B                                                           |
| ortholog02404 | 0.002514              | 2  | evm.model.Contig10.869 | CRS2-associated factor 1, mitochondrial                                          |
| ortholog05992 | $1.02 \times 10^{-8}$ | 7  | evm.model.Contig19.400 | Armadillo repeat-containing protein 6                                            |

---

|               |                       |    |                         |                                                                                                                 |
|---------------|-----------------------|----|-------------------------|-----------------------------------------------------------------------------------------------------------------|
| ortholog04006 | 0.030848              | 1  | evm.model.Contig11.815  | Masparidin                                                                                                      |
| ortholog08100 | 2.76×10 <sup>-5</sup> | 11 | evm.model.Contig7.327   | Uncharacterized protein C57A10.07                                                                               |
| ortholog00483 | 0.000683              | 2  | evm.model.Contig10.270  | 50S ribosomal protein L1, chloroplastic                                                                         |
| ortholog07104 | 0.010222              | 1  | evm.model.Contig7.780   | Protein CLT2, chloroplastic                                                                                     |
| ortholog00621 | 0.012093              | 2  | evm.model.Contig11.172  | WD repeat-containing protein WRAP73                                                                             |
| ortholog05207 | 0.046867              | 1  | evm.model.Contig7.1252  | Uncharacterized sugar kinase slr0537                                                                            |
| ortholog08484 | 0.015047              | 1  | evm.model.Contig14.275  | Probable dolichyl-diphosphooligosaccharide-protein glycosyltransferase subunit 3B                               |
| ortholog00141 | 0.000148              | 2  | evm.model.Contig11.732  | Chaperone protein dnaJ 13                                                                                       |
| ortholog07284 | 0.010601              | 7  | evm.model.Contig4.646   | Putative pentatricopeptide repeat-containing protein At1g02420                                                  |
| ortholog06462 | 0.009994              | 1  | evm.model.Contig7.855   | Chaperone protein dnaJ                                                                                          |
| ortholog01779 | 0.021626              | 1  | evm.model.Contig6.654   | Hydroxyacylglutathione hydrolase cytoplasmic                                                                    |
| ortholog03952 | 0.000704              | 1  | evm.model.Contig5.404   | Methylcrotonoyl-CoA carboxylase subunit alpha, mitochondrial                                                    |
| ortholog04243 | 0.01528               | 8  | evm.model.Contig2.1229  | rRNA methyltransferase 1, mitochondrial                                                                         |
| ortholog08493 | 0.0459                | 3  | evm.model.Contig6.1588  | Oxygen-dependent coproporphyrinogen-III oxidase, chloroplastic                                                  |
| ortholog07701 | 0                     | 11 | evm.model.Contig11.1048 | Probable LRR receptor-like serine/threonine-protein kinase At3g47570                                            |
| ortholog16622 | 0.037958              | 1  | evm.model.Contig12.930  | Pentatricopeptide repeat-containing protein At3g18020                                                           |
| ortholog05078 | 0.028468              | 1  | evm.model.Contig2.1159  | Probable acyl-[acyl-carrier-protein]-UDP- <i>N</i> -acetylglucosamine- <i>O</i> -acyltransferase, mitochondrial |
| ortholog01700 | 0.022949              | 2  | evm.model.Contig5.356   | Chloroplast stem-loop binding protein of 41 kDa, chloroplastic                                                  |
| ortholog04031 | 0.011329              | 2  | evm.model.Contig6.1175  | Ribonuclease H2 subunit A                                                                                       |
| ortholog08157 | 0.029378              | 1  | evm.model.Contig10.977  | Dynamin-like protein ARC5                                                                                       |
| ortholog12998 | 0.02605               | 1  | evm.model.Contig6.178   | Cell division control protein 14                                                                                |
| ortholog09954 | 0.025488              | 2  | evm.model.Contig6.235   | Probable protein phosphatase 2C 76                                                                              |
| ortholog03091 | 0.016347              | 1  | evm.model.Contig7.468   | Uncharacterized aarF domain-containing protein kinase At1g71810,                                                |

---

|               |                       |   |                        |                                                                           |
|---------------|-----------------------|---|------------------------|---------------------------------------------------------------------------|
| ortholog13718 | 0.031591              | 2 | evm.model.Contig15.176 | chloroplastic<br>Probable arabinosyltransferase ARAD1                     |
| ortholog02624 | 0.002228              | 6 | evm.model.Contig10.837 | Fasciclin-like arabinogalactan protein 8                                  |
| ortholog18122 | 0.004715              | 7 | evm.model.Contig8.315  | DDB1- and CUL4-associated factor 13                                       |
| ortholog16265 | 0.027547              | 1 | evm.model.Contig15.355 | DNA-repair protein XRCC1                                                  |
| ortholog18609 | 0.006866              | 2 | evm.model.Contig8.853  | Fasciclin-like arabinogalactan protein 7                                  |
| ortholog18594 | 0.014358              | 1 | evm.model.Contig2.257  | Probable plastid-lipid-associated protein 13, chloroplastic               |
| ortholog08194 | $7.07 \times 10^{-5}$ | 3 | evm.model.Contig7.1228 | Probable methyltransferase PMT28                                          |
| ortholog01210 | 0.046787              | 1 | evm.model.Contig5.783  | Uncharacterized CRM domain-containing protein At3g25440,<br>chloroplastic |

---

**Table S20** The genes involved in indole alkaloids biosynthesis.

| Pathway                                 | Gene                                                               | Enzyme No.                                      | Number          | Seq No.                                                                                                                                       |                                                                                |
|-----------------------------------------|--------------------------------------------------------------------|-------------------------------------------------|-----------------|-----------------------------------------------------------------------------------------------------------------------------------------------|--------------------------------------------------------------------------------|
| MEP<br>Pathway                          | 1-Deoxy-D-xylulose-5-phosphate synthase                            | [EC:2.2.1.7]                                    | 4               | Contig1.321,<br>Contig2.892,<br>Contig3.463,<br>Contig21.325                                                                                  |                                                                                |
|                                         | 1-Deoxy-D-xylulose-5-phosphate reductoisomerase                    | [EC:1.1.1.267]                                  | 1               | Contig12.343                                                                                                                                  |                                                                                |
|                                         | 2-C-Methyl-D-erythritol 4-phosphate cytidyltransferase             | [EC:2.7.7.60]                                   | 1               | Contig9.677                                                                                                                                   |                                                                                |
|                                         | 4-Diphosphocytidyl-2-C-methyl-D-erythritol kinase                  | [EC:2.7.1.148]                                  | 1               | Contig4.740                                                                                                                                   |                                                                                |
|                                         | 2-C-Methyl-D-erythritol 2,4-cyclodiphosphate synthase              | [EC:4.6.1.12]                                   | 1               | Contig21.242                                                                                                                                  |                                                                                |
|                                         | (E)-4-Hydroxy-3-methylbut-2-enyl-diphosphate synthase (ferredoxin) | [EC:1.17.7.1]                                   | 1               | Contig5.1404                                                                                                                                  |                                                                                |
|                                         | 4-Hydroxy-3-methylbut-2-enyl diphosphate reductase                 | [EC:1.17.1.2]                                   | 1               | Contig19.347                                                                                                                                  |                                                                                |
|                                         | MVA<br>Pathway                                                     | Acetyl-CoA acetyltransferase                    | [EC:2.3.1.9]    | 2                                                                                                                                             | Contig23.94,<br>Contig32.7                                                     |
|                                         |                                                                    | Hydroxymethylglutaryl-CoA synthase              | [EC:2.3.3.10]   | 1                                                                                                                                             | Contig11.883                                                                   |
|                                         |                                                                    | 3-Hydroxy-3-methylglutaryl-coenzyme A reductase | [EC:1.1.1.34]   | 3                                                                                                                                             | Contig3.680,<br>Contig7.1553,<br>Contig19.3                                    |
| Mevalonate kinase                       |                                                                    | [EC:2.7.1.36]                                   | 1               | Contig9.284                                                                                                                                   |                                                                                |
| 5-Phosphomevalonate kinase              |                                                                    | [EC:2.7.4.2]                                    | 1               | Contig11.139                                                                                                                                  |                                                                                |
| Diphosphomevalonatedecarboxylase        |                                                                    | [EC:4.1.1.33]                                   | 1               | Contig6.1194                                                                                                                                  |                                                                                |
| Isopentenyl-diphosphate delta-isomerase |                                                                    | [EC:5.3.3.2]                                    | 2               | Contig6.1499,<br>Contig6.1500                                                                                                                 |                                                                                |
| Monoterpenoid<br>biosynthesis           |                                                                    | Geranylgeranyldiphosphatesynthase               | [EC:2.5.1.1]    | 5                                                                                                                                             | Contig20.363,<br>Contig3.1039,<br>Contig3.522,<br>Contig7.1184,<br>Contig19.86 |
|                                         |                                                                    | Geraniol synthase                               | [EC:3.1.7.11]   | 1                                                                                                                                             | Contig8.533                                                                    |
|                                         |                                                                    | Geraniol 8-hydroxylase(CYP76B6)                 | [EC:1.14.14.83] | 4                                                                                                                                             | Contig3.1451,<br>Contig3.1452,<br>Contig11.148,<br>Contig11.809                |
|                                         | 8-Hydroxygeraniol dehydrogenase                                    | [EC:1.1.1.324]                                  | 9               | Contig1.1602,<br>Contig3.473,<br>Contig3.495,<br>Contig3.496,<br>Contig3.502,<br>Contig3.503,<br>Contig3.514,<br>Contig3.515,<br>Contig10.255 |                                                                                |
|                                         | 7-Deoxyloganate 7-hydroxylase                                      | [EC:1.14.14.85]                                 | 0               | Not Found                                                                                                                                     |                                                                                |
|                                         | Secologaninsynthase                                                | [EC:1.14.19.62]                                 | 4               | Contig1.875,<br>Contig10.302,<br>Contig20.787,<br>Contig20.789                                                                                |                                                                                |
|                                         | S-Adenosyl-L-methionine-dependent methyltransferase                | [EC:2.1.1.50]                                   | 2               | Contig5.182,<br>Contig7.1229                                                                                                                  |                                                                                |
|                                         | Indole alkaloid<br>biosynthesis                                    | L-Tryptophan decarboxylase                      | [EC:4.1.1.105]  | 1                                                                                                                                             | Contig8.637                                                                    |
|                                         |                                                                    | Strictosidinesynthase                           | [EC:4.3.3.2]    | 17                                                                                                                                            | Contig2.1043,                                                                  |

|                                             |                |    |                                                                                                                                                                                                                                                                                                      |
|---------------------------------------------|----------------|----|------------------------------------------------------------------------------------------------------------------------------------------------------------------------------------------------------------------------------------------------------------------------------------------------------|
|                                             |                |    | Contig3.748,<br>Contig3.749,<br>Contig4.259,<br>Contig4.262,<br>Contig4.611,<br>Contig8.636,<br>Contig8.825,<br>Contig12.325,<br>Contig12.326,<br>Contig12.327,<br>Contig12.756,<br>Contig12.757,<br>Contig15.402,<br>Contig15.403,<br>Contig16.448,<br>Contig16.449                                 |
| Strictosidine- <i>O</i> -beta-D-glucosidase | [EC:3.2.1.105] | 5  | Contig3.622,<br>Contig9.61,<br>Contig9.70,<br>Contig9.75,<br>Contig9.82                                                                                                                                                                                                                              |
| Geissoschizinedehydrogenase                 | [EC:1.3.1.36]  | 0  | Not Found                                                                                                                                                                                                                                                                                            |
| Sarpagan bridge enzyme                      |                | 0  | Not Found                                                                                                                                                                                                                                                                                            |
| Polyneuridine-aldehyde esterase             | [EC:3.1.1.78]  | 15 | Contig1.1627,<br>Contig1.1628,<br>Contig3.488,<br>Contig3.491,<br>Contig3.500,<br>Contig3.539,<br>Contig3.540,<br>Contig3.541,<br>Contig3.542,<br>Contig4.1007,<br>Contig4.1008,<br>Contig4.1010,<br>Contig9.60,<br>Contig11.1021,<br>Contig26.32                                                    |
| Vinorine synthase                           | [EC:2.3.1.160] | 20 | Contig1.1102,<br>Contig1.926,<br>Contig1.927,<br>Contig1.928,<br>Contig1.930,<br>Contig5.1734,<br>Contig5.1734,<br>Contig6.1902,<br>Contig6.805,<br>Contig9.136,<br>Contig9.137,<br>Contig9.139,<br>Contig10.686,<br>Contig11.1060,<br>Contig12.263,<br>Contig12.93,<br>Contig12.96,<br>Contig12.97, |

|                                       |               |   |                                                                                                                                                                           |
|---------------------------------------|---------------|---|---------------------------------------------------------------------------------------------------------------------------------------------------------------------------|
| Raucaffricine- $\beta$ -D-glucosidase | [EC:3.2.1.21] | 9 | Contig13.599,<br>Contig15.392<br>Contig2.805,<br>Contig2.806,<br>Contig2.809,<br>Contig9.66,<br>Contig9.67,<br>Contig9.69,<br>Contig9.86,<br>Contig26.100,<br>Contig26.99 |
|---------------------------------------|---------------|---|---------------------------------------------------------------------------------------------------------------------------------------------------------------------------|

Total

113

---

**Table S21** Versions and main parameters of the software used in this study.

| Software      | Version        | Parameter                                                                                                                 |
|---------------|----------------|---------------------------------------------------------------------------------------------------------------------------|
| Canu          | 1.3            | length_cutoff, 11kb; length_cutoff_pr, 11.5 kb                                                                            |
| WTDBG         | 1.2.8          | Default                                                                                                                   |
| PBJelly       | PBSuite_14.9.9 | Default                                                                                                                   |
| BWA           | 0.7.12-r1039   | Default                                                                                                                   |
| Pilon         | 1.20           | --changes --vcf --diploid --fix bases --threads 32 --mindepth 10                                                          |
| HISAT         | 2.0.0-beta     | hisat2 -N 1                                                                                                               |
| RepeatMasker  | open-4.0.6     | RepeatMaskernolow -q -no_is -gff -norna -parallel 1 -engine wublast -species Viridiplantae                                |
| RepeatModeler | 1.0.4          | RepeatModeler -pa 30 -database zhongrenkeyuan.contigs.2.fasta -engine wublast                                             |
| tRNAscan-SE   | 1.3.1          | tRNAscan-SE -i -o -m                                                                                                      |
| RNAmmer       | 1.2            | rnammer -S euk -m lsu,ssu,tsu -gff                                                                                        |
| GeneWise      | wise2-4-1      | genewise -genesf -gff -sum                                                                                                |
| Augustus      | 3.0            | augustus-UTR=off --gff3=on --genemodel=complete --strand=both --min_intron_len=15                                         |
| GeneID        | 1.4            | geneid -3 -P arabidopsis.param.Aug_4_2004                                                                                 |
| GlimmerHMM    | 3.0.4          | default                                                                                                                   |
| SNAP          | 2013/2/16      | default                                                                                                                   |
| MCMCTREE      | PAML v4.9e     | Clock=2, RootAge≤1.73, model=7, BDparas=110, kappa_gamma = 62, alpha_gamma = 11, rgene_gamma = 23.18, sigma2_gamma = 14.5 |
| Codeml        | PAML v4.9e     | Model A: model = 2, NSsites = 2, fix_omega = 0; Model A1: model = 2, NSsites = 2, fix_omega = 1, omega = 1                |
| CAFE          | 3.0            | load -p 0.05 -r 10,000 , lambda -s                                                                                        |

**Table S22** Genome summary of *Gelsemium elegans* and closely related species.

| Specie                     | Assembly<br>Genome size<br>(Mb) | Contig<br>N50 (kb) | Scaffold<br>N50 (Mb) | Complete<br>BUSCOs<br>(%) | Protein-coding<br>genes |
|----------------------------|---------------------------------|--------------------|----------------------|---------------------------|-------------------------|
| <i>Gelsemium elegans</i>   | 335.13                          | 10,230             | 40.47                | 92.9                      | 26,768                  |
| <i>Calotropis gigantea</i> | 157.28                          | 48.58              | 0.81                 | 89.8                      | 18,197                  |
| <i>Camellia sinensis</i>   | 3,140                           | 67.07              | 1.39                 | 98.0                      | 33,932                  |
| <i>Macleaya cordata</i>    | 378                             | 25                 | 0.308                | 90.4                      | 22,328                  |
